# Supplementary material for: A 7-Week Summer Camp in Antarctica Induces Fluctuations on Human Oral Microbiome, Pro-Inflammatory Markers and Metabolic Hormones Profile
Source: MDPI journal article supplement (doi:10.3390/microorganisms11020339), 2023-01-30
Supplement: s1 [file s1]

## Values obtained in normality and equivariance tests of statistical analysis for posterior pairwise comparisons

Michele M Moraes, Thiago T Mendes, Leandro Borges, Alice L Marques, Cristian Núñez-Espinosa, Dawit AP Gonçalves, Carolina B Simões, Tales S Vieira, Roberto VP Ladeira, Talita GB Lourenco, Danielle V Ribeiro, Elaine Hatanaka, Debora Heller, Rosa ME Arantes

This is Supplemental material S3 for the article: **A 7-week summer camp in Antarctica induces fluctuations on human oral microbiome, pro-inflammatory markers and metabolic hormones profile**

**Table S3.1.** Values obtained in normality and equivariance tests at the phylum level

| Phylum                               | Normality                     | Equal Variance |
|--------------------------------------|-------------------------------|----------------|
| <i>Actinomyces</i>                   | W-Statistic = 0.934 P = 0.181 | P = 0.604      |
| Bacteria unclassified*               | W-Statistic = 0.956 P = 0.473 | P = 0.618      |
| <i>Bacteroidota</i>                  | W-Statistic = 0.963 P = 0.606 | P = 0.747      |
| <i>Bacillota</i> Firmicutes          | W-Statistic = 0.935 P = 0.196 | P = 0.284      |
| Fusobacteria                         | W-Statistic = 0.953 P = 0.421 | P = 0.868      |
| Gracilibacteria (GN02) T: reciprocal | W-Statistic = -- P = 1.000    | P = 0.867      |
| <i>Pseudomonadota</i> Proteobacteria | W-Statistic = 0.982 P = 0.962 | P = 0.607      |
| SR1 T: sqrt                          | W-Statistic = 0.975 P = 0.849 | P = 0.466      |
| Spirochaetes T: log10                | W-Statistic = 0.958 P = 0.513 | P = 0.589      |
| Synergistetes T: reciprocal          | W-Statistic = -- P = 1.000    | P = 0.626      |

Footnote: *Pseudomonadota*, former *Proteobacteria*. *Bacillota*, former *Firmicutes*. *Bacteroidota*, former *Bacteroidetes*. *Actinomyces*, former *Actinobacteria*. T: transformation applied to the data. Sqrt: Square root.

**Table S3.2.** Values obtained in normality and equivariance tests at the genus level

| Genus                                      | Normality                     | Equal Variance |
|--------------------------------------------|-------------------------------|----------------|
| Clostridiales unclassified T: ln           | W-Statistic = 0.974 P = 0.835 | P = 0.606      |
| Granulicatella T: ln                       | W-Statistic = 0.939 P = 0.228 | P = 0.295      |
| Mogibacterium T: rank                      | W-Statistic = 0.947 P = 0.320 | P = 0.198      |
| Firmicutes unclassified                    | W-Statistic = 0.979 P = 0.927 | P = 0.630      |
| Ruminococcaceae [G-1] 1.0/                 | W-Statistic = 0.821 P = 0.002 | P = 0.601      |
| Veillonellaceae [G-1]                      | Kruskal-Wallis                |                |
| Abiotrophia                                | W-Statistic = 0.946 P = 0.307 | P = 0.501      |
| Lachnoanaerobaculum                        | W-Statistic = 0.919 P = 0.096 | P = 0.221      |
| Solobacterium T: rank                      | W-Statistic = 0.954 P = 0.423 | P = 0.880      |
| Gemella T: sqrt                            | W-Statistic = 0.904 P = 0.050 | P = 0.348      |
| Filifactor                                 | Kruskal-Wallis                |                |
| Oribacterium T: ln                         | W-Statistic = 0.967 P = 0.688 | P = 0.340      |
| Streptococcus T: ln                        | W-Statistic = 0.967 P = 0.684 | P = 0.317      |
| Ruminococcaceae [G-2] T: rank              | W-Statistic = 0.951 P = 0.381 | P = 0.601      |
| Lachnospiraceae [XIV] unclassified T: rank | W-Statistic = 0.956 P = 0.473 | P = 0.790      |
| Peptostreptococcaceae [XI][G-5]            | Kruskal-Wallis                |                |
| Lactobacillus T: 1.0/                      | Kruskal-Wallis                |                |
| Veillonella                                | W-Statistic = 0.945 P = 0.293 | P = 0.263      |
| Dialister T: rank                          | W-Statistic = 0.960 P = 0.539 | P = 0.368      |
| Catonella T: rank                          | W-Statistic = 0.960 P = 0.551 | P = 0.701      |
| SR1 [G-1] T: rank                          | W-Statistic = 0.959 P = 0.516 | P = 0.099      |
| Sneathia                                   | Kruskal-Wallis                |                |
| Leptotrichia                               | W-Statistic = 0.964 P = 0.635 | P = 0.547      |
| Fusobacterium T: ln                        | W-Statistic = 0.960 P = 0.544 | P = 0.991      |
| Bergeyella T: ln                           | W-Statistic = 0.965 P = 0.645 | P = 0.444      |
| Alloprevotella                             | W-Statistic = 0.969 P = 0.741 | P = 0.268      |
| Bacteroidetes unclassified                 | W-Statistic = 0.962 P = 0.583 | P = 0.810      |
| Capnocytophaga                             | W-Statistic = 0.907 P = 0.057 | P = 0.534      |
| Prevotella                                 | W-Statistic = 0.933 P = 0.178 | P = 0.988      |

|                                        |                               |           |
|----------------------------------------|-------------------------------|-----------|
| Bacteroides                            | W-Statistic = 0.980 P = 0.932 | P = 0.137 |
| Bacteroidales unclassified T: ln       | W-Statistic = 0.965 P = 0.649 | P = 0.456 |
| Actinomyces T: ln                      | W-Statistic = 0.953 P = 0.411 | P = 0.410 |
| Corynebacterium T: ln                  | W-Statistic = 0.979 P = 0.916 | P = 0.923 |
| Actinobacteria unclassified T: ln      | W-Statistic = 0.919 P = 0.096 | P = 0.326 |
| Rothia T: ln                           | W-Statistic = 0.949 P = 0.346 | P = 0.749 |
| Kingella T: ln                         | W-Statistic = 0.948 P = 0.335 | P = 0.503 |
| Eikenella T: rank                      | W-Statistic = 0.946 P = 0.309 | P = 0.603 |
| Neisseriaceae unclassified T: rank     | W-Statistic = 0.960 P = 0.539 | P = 0.341 |
| Neisseria                              | W-Statistic = 0.946 P = 0.312 | P = 0.825 |
| Escherichia T: rank                    | W-Statistic = 0.953 P = 0.412 | P = 0.909 |
| Stenotrophomonas T: ln                 | Kruskal-Wallis                |           |
| Treponema                              | W-Statistic = 0.958 P = 0.513 | P = 0.589 |
| Fretibacterium                         | Kruskal-Wallis                |           |
| Porphyromonas T: ln                    | W-Statistic = 0.981 P = 0.943 | P = 0.715 |
| Bacteroidales [G-2] T: asinsqrt        | W-Statistic = 0.936 P = 0.198 | P = 0.943 |
| Bacteroidetes [G-5]                    | Kruskal-Wallis                |           |
| Tannerella T: ln                       | W-Statistic = 0.938 P = 0.224 | P = 0.507 |
| Megasphaera T: ln                      | W-Statistic = 0.963 P = 0.605 | P = 0.093 |
| Peptostreptococcaceae [XI][G-7 T: rank | W-Statistic = 0.935 P = 0.189 | P = 0.529 |
| Stomatobaculum                         | W-Statistic = 0.944 P = 0.290 | P = 0.816 |
| Selenomonas ln                         | W-Statistic = 0.921 P = 0.104 | P = 0.424 |
| Peptostreptococcus                     | W-Statistic = 0.952 P = 0.400 | P = 0.495 |
| Lachnospiraceae [G-3] T: rank          | W-Statistic = 0.920 P = 0.099 | P = 0.708 |
| Peptostreptococcaceae [XI][G-1 T: rank | W-Statistic = 0.955 P = 0.449 | P = 0.127 |
| Parvimonas rank                        | W-Statistic = 0.960 P = 0.541 | P = 0.487 |
| Staphylococcus T: ln                   | W-Statistic = 0.952 P = 0.392 | P = 0.675 |
| Atopobium T: rank                      | W-Statistic = 0.960 P = 0.543 | P = 0.693 |
| Actinobaculum                          | Kruskal-Wallis                |           |
| Campylobacter                          | W-Statistic = 0.929 P = 0.146 | P = 0.537 |
| Cardiobacterium T: ln                  | W-Statistic = 0.934 P = 0.187 | P = 0.355 |
| Haemophilus                            | W-Statistic = 0.929 P = 0.147 | P = 0.951 |
| Aggregatibacter T: rank                | W-Statistic = 0.960 P = 0.551 | P = 0.114 |
| Pasteurellaceae unclassified T: ln     | W-Statistic = 0.981 P = 0.947 | P = 0.631 |
| Lautropia T: ln                        | W-Statistic = 0.982 P = 0.953 | P = 0.498 |

Footnote: T: transformation applied to the data. Asinsqrt: Arcsin square root. Ln: Logarithmic. Rank: data replacement by their ranks (or average ranks in case of ties) - i.e., for the lowest value: rank 1; for the second lowest value: rank 2, and so on [95]. 1.0/: Reciprocal. Sqrt: Square root.

## Reference

95. Conover, W. The rank transformation—an easy and intuitive way to connect many nonparametric methods to their parametric counterparts for seamless teaching introductory statistics courses. *WIREs Comput. Stat.* **2012**, *4*, 432–438. <https://doi.org/10.1002/wics.1216>.
