# Supplementary material for: A 7-Week Summer Camp in Antarctica Induces Fluctuations on Human Oral Microbiome, Pro-Inflammatory Markers and Metabolic Hormones Profile
Source: MDPI journal article supplement (doi:10.3390/microorganisms11020339), 2023-01-30
Supplement: s1 [file s1]

## Association between the relative abundance of bacterial genus and diversity indexes with cytokine and signal proteins

Michele M Moraes, Thiago T Mendes, Leandro Borges, Alice L Marques, Cristian Núñez-Espinosa, Dawit AP Gonçalves, Carolina B Simões, Tales S Vieira, Roberto VP Ladeira, Talita GB Lourenco, Danielle V Ribeiro, Elaine Hatanaka, Debora Heller, Rosa ME Arantes

This is Supplemental material S5 for the article: **A 7-week summer camp in Antarctica induces fluctuations on human oral microbiome, pro-inflammatory markers and metabolic hormones profile**

**Table S5.** Results of Spearman's correlations between the relative abundance of bacterial genus and diversity indexes with cytokine and signal proteins.

| Genus                                 | Leptin                           | IL-8                             | IL1- $\beta$                     | IL-6                            | VEGF                             | hs-CRP                           | TNF- $\alpha$                    |
|---------------------------------------|----------------------------------|----------------------------------|----------------------------------|---------------------------------|----------------------------------|----------------------------------|----------------------------------|
| 1 Clostridiales_unclassified          | r = 0.332<br>p = 0.149           | r = -0.013<br>p = 0.952          | r = -0.313<br>p = 0.176          | r = 0.029<br>p = 0.901          | r = -0.44<br>p = 0.058           | r = -0.225<br>p = 0.333          | r = -0.107<br>p = 0.657          |
| 2 Granulicatella                      | r = 0.402<br>p = 0.078           | r = -0.383<br>p = 0.093          | r = <b>-0.704 *</b><br>p = 0.001 | r = 0.146<br>p = 0.534          | r = <b>-0.593 *</b><br>p = 0.007 | r = -0.341<br>p = 0.138          | r = <b>-0.482 *</b><br>p = 0.036 |
| 3 Mogibacterium                       | r = -0.105<br>p = 0.662          | r = <b>-0.452 *</b><br>p = 0.050 | r = -0.415<br>p = 0.075          | r = -0.186<br>p = 0.439         | r = -0.198<br>p = 0.421          | r = -0.334<br>p = 0.157          | r = <b>-0.533 *</b><br>p = 0.022 |
| 4 Firmicutes_unclassified             | r = 0.318<br>p = 0.169           | r = -0.013<br>p = 0.952          | r = -0.263<br>p = 0.257          | r = 0.079<br>p = 0.733          | r = -0.265<br>p = 0.268          | r = -0.147<br>p = 0.529          | r = -0.147<br>p = 0.541          |
| 5 Ruminococcaceae_[G-1]               | r = -0.037<br>p = 0.871          | r = -0.156<br>p = 0.504          | r = 0.044<br>p = 0.846           | r = 0.212<br>p = 0.364          | r = 0.055<br>p = 0.815           | r = 0.070<br>p = 0.762           | r = -0.149<br>p = 0.536          |
| 6 Veillonellaceae_[G-1]               | r = -0.258<br>p = 0.293          | r = -0.116<br>p = 0.638          | r = 0.103<br>p = 0.674           | r = -0.093<br>p = 0.705         | r = 0.063<br>p = 0.802           | r = -0.131<br>p = 0.597          | r = -0.308<br>p = 0.222          |
| 7 Abiotrophia                         | r = <b>0.489 *</b><br>p = 0.029  | r = -0.317<br>p = 0.169          | r = -0.278<br>p = 0.230          | r = <b>0.423 *</b><br>p = 0.062 | r = -0.181<br>p = 0.453          | r = 0.015<br>p = 0.947           | r = -0.046<br>p = 0.848          |
| 8 Lachnoanaerobaculum                 | r = 0.212<br>p = 0.377           | r = 0.028<br>p = 0.905           | r = -0.040<br>p = 0.865          | r = 0.107<br>p = 0.657          | r = 0.059<br>p = 0.811           | r = -0.226<br>p = 0.345          | r = 0.020<br>p = 0.934           |
| 9 Solobacterium                       | r = 0.181<br>p = 0.453           | r = 0.103<br>p = 0.667           | r = -0.015<br>p = 0.945          | r = 0.214<br>p = 0.373          | r = 0.038<br>p = 0.876           | r = -0.129<br>p = 0.590          | r = 0.041<br>p = 0.863           |
| 10 Gemella                            | r = <b>0.486 *</b><br>p = 0.030  | r = -0.039<br>p = 0.866          | r = -0.278<br>p = 0.230          | r = 0.514<br>p = 0.02           | r = -0.219<br>p = 0.361          | r = <b>-0.442 *</b><br>p = 0.050 | r = -0.126<br>p = 0.600          |
| 11 Filifactor                         | r = <b>-0.488 *</b><br>p = 0.039 | r = 0.031<br>p = 0.895           | r = 0.238<br>p = 0.334           | r = -0.34<br>p = 0.164          | r = 0.402<br>p = 0.107           | r = 0.066<br>p = 0.792           | r = -0.206<br>p = 0.420          |
| 12 Oribacterium                       | r = 0.020<br>p = 0.932           | r = 0.093<br>p = 0.691           | r = 0.080<br>p = 0.733           | r = 0.078<br>p = 0.738          | r = -0.116<br>p = 0.631          | r = -0.143<br>p = 0.542          | r = -0.319<br>p = 0.179          |
| 13 Streptococcus                      | r = <b>0.412 *</b><br>p = 0.070  | r = -0.098<br>p = 0.676          | r = <b>-0.475 *</b><br>p = 0.034 | r = 0.182<br>p = 0.437          | r = <b>-0.467 *</b><br>p = 0.043 | r = <b>-0.568 *</b><br>p = 0.009 | r = -0.205<br>p = 0.393          |
| 14 Ruminococcaceae_[G-2]              | r = 0.025<br>p = 0.911           | r = <b>0.449 *</b><br>p = 0.046  | r = <b>0.454 *</b><br>p = 0.044  | r = 0.226<br>p = 0.330          | r = 0.374<br>p = 0.112           | r = 0.323<br>p = 0.161           | r = 0.207<br>p = 0.389           |
| 15 Lachnospiraceae_[XIV]_unclassified | r = -0.005<br>p = 0.982          | r = 0.023<br>p = 0.921           | r = -0.036<br>p = 0.876          | r = 0.048<br>p = 0.836          | r = 0.002<br>p = 0.991           | r = 0.084<br>p = 0.719           | r = -0.332<br>p = 0.162          |
| 16 Peptostreptococcaceae_[XI][G-5]    | r = -0.164<br>p = 0.498          | r = -0.049<br>p = 0.837          | r = 0.135<br>p = 0.575           | r = 0.040<br>p = 0.865          | r = 0.107<br>p = 0.668           | r = -0.077<br>p = 0.748          | r = -0.189<br>p = 0.446          |
| 17 Lactobacillus                      | r = 0.381<br>p = 0.095           | r = 0.092<br>p = 0.695           | r = -0.305<br>p = 0.187          | r = 0.143<br>p = 0.542          | r = -0.317<br>p = 0.184          | r = -0.344<br>p = 0.134          | r = -0.246<br>p = 0.305          |
| 18 Veillonella                        | r = 0.302<br>p = 0.191           | r = 0.277<br>p = 0.233           | r = 0.129<br>p = 0.581           | r = 0.286<br>p = 0.218          | r = 0.279<br>p = 0.242           | r = -0.075<br>p = 0.748          | r = 0.333<br>p = 0.159           |
| 19 Dialister                          | r = -0.095<br>p = 0.686          | r = 0.382<br>p = 0.095           | r = 0.355<br>p = 0.122           | r = 0.144<br>p = 0.538          | r = 0.405<br>p = 0.0833          | r = -0.102<br>p = 0.663          | r = 0.211<br>p = 0.381           |
| 20 Catonella                          | r = 0.302<br>p = 0.191           | r = -0.143<br>p = 0.542          | r = 0.015<br>p = 0.947           | r = 0.438<br>p = 0.053          | r = -0.009<br>p = 0.968          | r = 0.102<br>p = 0.663           | r = -0.021<br>p = 0.928          |
| 21 SR1_[G-1]                          | r = -0.080<br>p = 0.733          | r = 0.048<br>p = 0.836           | r = 0.195<br>p = 0.403           | r = 0.121<br>p = 0.603          | r = 0.273<br>p = 0.252           | r = 0.177<br>p = 0.448           | r = 0.060<br>p = 0.798           |
| 22 Sneathia                           | r = -0.054<br>p = 0.820          | r = <b>-0.603 *</b><br>p = 0.006 | r = <b>-0.549 *</b><br>p = 0.015 | r = -0.30<br>p = 0.207          | r = -0.178<br>p = 0.471          | r = -0.057<br>p = 0.809          | r = -0.275<br>p = 0.263          |
| 23 Leptotrichia                       | r = 0.253<br>p = 0.277           | r = 0.161<br>p = 0.492           | r = 0.155<br>p = 0.508           | r = 0.317<br>p = 0.170          | r = 0.039<br>p = 0.871           | r = 0.293<br>p = 0.205           | r = -0.188<br>p = 0.435          |
| 24 Fusobacterium                      | r = -0.020<br>p = 0.927          | r = -0.014<br>p = 0.947          | r = 0.105<br>p = 0.653           | r = 0.171<br>p = 0.464          | r = 0.019<br>p = 0.934           | r = 0.352<br>p = 0.125           | r = -0.168<br>p = 0.484          |
| 25 Bergeyella                         | r = 0.007<br>p = 0.972           | r = <b>-0.589 *</b><br>p = 0.006 | r = -0.412<br>p = 0.070          | r = 0.120<br>p = 0.608          | r = -0.254<br>p = 0.288          | r = -0.138<br>p = 0.555          | r = -0.372<br>p = 0.114          |
| 26 Alloprevotella                     | r = -0.016<br>p = 0.942          | r = 0.086<br>p = 0.714           | r = 0.239<br>p = 0.305           | r = 0.179<br>p = 0.444          | r = 0.270<br>p = 0.258           | r = 0.131<br>p = 0.577           | r = 0.068<br>p = 0.776           |

|    |                                             |                         |                                  |                                  |                                 |                                  |                                  |                                   |
|----|---------------------------------------------|-------------------------|----------------------------------|----------------------------------|---------------------------------|----------------------------------|----------------------------------|-----------------------------------|
| 27 | <b>Bacteroidetes_unclassified</b>           | r = 0.192<br>p = 0.410  | r = -0.055<br>p = 0.811          | r = <b>-0.451 *</b><br>p = 0.045 | r = -0.158<br>p = 0.500         | r = -0.368<br>p = 0.118          | r = -0.125<br>p = 0.594          | r = <b>-0.456 *</b><br>p = 0.049  |
| 28 | <b>Capnocytophaga</b>                       | r = 0.126<br>p = 0.590  | r = -0.11<br>p = 0.639           | r = -0.174<br>p = 0.456          | r = 0.087<br>p = 0.710          | r = 0.068<br>p = 0.776           | r = 0.247<br>p = 0.289           | r = 0.023<br>p = 0.922            |
| 29 | <b>Prevotella</b>                           | r = 0.078<br>p = 0.738  | r = 0.298<br>p = 0.198           | r = 0.352<br>p = 0.125           | r = 0.298<br>p = 0.198          | r = 0.242<br>p = 0.312           | r = 0.092<br>p = 0.695           | r = 0.046<br>p = 0.848            |
| 30 | <b>Bacteroides</b>                          | r = 0.168<br>p = 0.472  | r = 0.087<br>p = 0.710           | r = -0.088<br>p = 0.705          | r = -0.035<br>p = 0.881         | r = -0.246<br>p = 0.305          | r = 0.286<br>p = 0.218           | r = -0.136<br>p = 0.570           |
| 31 | <b>Bacteroidales_unclassified</b>           | r = 0.024<br>p = 0.916  | r = -0.360<br>p = 0.116          | r = <b>-0.599 *</b><br>p = 0.005 | r = -0.289<br>p = 0.213         | r = -0.562<br>p = 0.012          | r = -0.097<br>p = 0.676          | r = <b>-0.658 *</b><br>p = 0.002  |
| 32 | <b>Actinomyces</b>                          | r = 0.122<br>p = 0.603  | r = -0.159<br>p = 0.496          | r = -0.305<br>p = 0.187          | r = 0.134<br>p = 0.568          | r = -0.375<br>p = 0.111          | r = -0.066<br>p = 0.777          | r = -0.404<br>p = 0.085           |
| 33 | <b>Corynebacterium</b>                      | r = -0.095<br>p = 0.686 | r = -0.037<br>p = 0.871          | r = -0.15<br>p = 0.521           | r = -0.205<br>p = 0.378         | r = -0.125<br>p = 0.600          | r = -0.396<br>p = 0.081          | r = -0.248<br>p = 0.298           |
| 34 | <b>Actinobacteria_unclassified</b>          | r = -0.093<br>p = 0.691 | r = -0.008<br>p = 0.967          | r = 0.127<br>p = 0.585           | r = 0.173<br>p = 0.460          | r = 0.037<br>p = 0.877           | r = 0.166<br>p = 0.480           | r = -0.091<br>p = 0.705           |
| 35 | <b>Rothia</b>                               | r = 0.047<br>p = 0.841  | r = 0.044<br>p = 0.846           | r = -0.252<br>p = 0.277          | r = -0.090<br>p = 0.700         | r = <b>-0.477 *</b><br>p = 0.038 | r = <b>-0.505 *</b><br>p = 0.023 | r = <b>-0.628 *</b><br>p = 0.004  |
| 36 | <b>Kingella</b>                             | r = 0.244<br>p = 0.295  | r = -0.227<br>p = 0.330          | r = -0.235<br>p = 0.314          | r = 0.089<br>p = 0.700          | r = -0.161<br>p = 0.503          | r = 0.39<br>p = 0.088            | r = -0.042<br>p = 0.860           |
| 37 | <b>Eikenella</b>                            | r = 0.290<br>p = 0.224  | r = 0.106<br>p = 0.657           | r = -0.122<br>p = 0.610          | r = 0.184<br>p = 0.444          | r = 0.002<br>p = 0.987           | r = 0.161<br>p = 0.503           | r = -0.156<br>p = 0.530           |
| 38 | <b>Neisseriaceae_unclassified</b>           | r = 0.149<br>p = 0.525  | r = 0.178<br>p = 0.444           | r = 0.265<br>p = 0.255           | r = 0.387<br>p = 0.090          | r = 0.379<br>p = 0.107           | r = 0.371<br>p = 0.105           | r = 0.267<br>p = 0.264            |
| 39 | <b>Neisseria</b>                            | r = -0.026<br>p = 0.911 | r = 0.105<br>p = 0.653           | r = 0.310<br>p = 0.180           | r = 0.274<br>p = 0.238          | r = 0.377<br>p = 0.109           | r = 0.280<br>p = 0.228           | r = 0.356<br>p = 0.131            |
| 40 | <b>Escherichia</b>                          | r = -0.084<br>p = 0.736 | r = 0.360<br>p = 0.138           | r = 0.184<br>p = 0.456           | r = -0.206<br>p = 0.407         | r = -0.117<br>p = 0.646          | r = <b>0.474 *</b><br>p = 0.046  | r = -0.262<br>p = 0.302           |
| 41 | <b>Stenotrophomonas</b>                     | r = 0.372<br>p = 0.137  | r = -0.369<br>p = 0.142          | r = <b>-0.629 *</b><br>p = 0.007 | r = 0.135<br>p = 0.598          | r = <b>-0.659 *</b><br>p = 0.005 | r = <b>-0.527 *</b><br>p = 0.029 | r = <b>-0.556 *</b><br>p = 0.0247 |
| 42 | <b>Treponema</b>                            | r = 0.019<br>p = 0.932  | r = -0.197<br>p = 0.399          | r = -0.070<br>p = 0.762          | r = 0.173<br>p = 0.460          | r = -0.025<br>p = 0.917          | r = 0.044<br>p = 0.851           | r = -0.311<br>p = 0.191           |
| 43 | <b>Fretibacterium</b>                       | r = 0.0321<br>p = 0.894 | r = -0.110<br>p = 0.646          | r = 0.062<br>p = 0.798           | r = 0.267<br>p = 0.264          | r = -0.039<br>p = 0.876          | r = -0.205<br>p = 0.393          | r = -0.248<br>p = 0.313           |
| 44 | <b>Porphyromonas</b>                        | r = 0.137<br>p = 0.559  | r = 0.102<br>p = 0.663           | r = 0.180<br>p = 0.440           | r = 0.284<br>p = 0.220          | r = 0.272<br>p = 0.255           | r = 0.367<br>p = 0.109           | r = -0.026<br>p = 0.911           |
| 45 | <b>Bacteroidales_[G-2]</b>                  | r = -0.040<br>p = 0.865 | r = 0.040<br>p = 0.865           | r = 0.214<br>p = 0.373           | r = 0.107<br>p = 0.657          | r = 0.267<br>p = 0.278           | r = 0.168<br>p = 0.484           | r = 0.044<br>p = 0.856            |
| 46 | <b>Bacteroidetes_[G-5]</b>                  | r = 0.110<br>p = 0.646  | r = -0.102<br>p = 0.673          | r = -0.026<br>p = 0.911          | r = 0.309<br>p = 0.194          | r = 0.103<br>p = 0.674           | r = -0.067<br>p = 0.781          | r = -0.170<br>p = 0.492           |
| 47 | <b>Tannerella</b>                           | r = 0.149<br>p = 0.525  | r = 0.259<br>p = 0.266           | r = 0.294<br>p = 0.203           | r = 0.296<br>p = 0.201          | r = 0.333<br>p = 0.159           | r = 0.143<br>p = 0.542           | r = 0.061<br>p = 0.790            |
| 48 | <b>Megasphaera</b>                          | r = 0.033<br>p = 0.886  | r = 0.344<br>p = 0.134           | r = 0.256<br>p = 0.269           | r = 0.325<br>p = 0.159          | r = 0.143<br>p = 0.550           | r = -0.141<br>p = 0.546          | r = 0.128<br>p = 0.595            |
| 49 | <b>Peptostreptococcaceae_[XI]<br/>[G-7]</b> | r = 0.055<br>p = 0.811  | r = <b>-0.451 *</b><br>p = 0.045 | r = -0.303<br>p = 0.191          | r = 0.190<br>p = 0.414          | r = -0.076<br>p = 0.748          | r = -0.211<br>p = 0.364          | r = -0.372<br>p = 0.114           |
| 50 | <b>Stomatobaculum</b>                       | r = -0.003<br>p = 0.986 | r = 0.032<br>p = 0.894           | r = 0.226<br>p = 0.345           | r = 0.165<br>p = 0.493          | r = 0.441<br>p = 0.066           | r = -0.074<br>p = 0.759          | r = 0.271<br>p = 0.270            |
| 51 | <b>Selenomonas</b>                          | r = 0.203<br>p = 0.385  | r = 0.197<br>p = 0.399           | r = 0.0391<br>p = 0.866          | r = 0.298<br>p = 0.198          | r = 0.023<br>p = 0.922           | r = -0.17<br>p = 0.468           | r = -0.270<br>p = 0.258           |
| 52 | <b>Peptostreptococcus</b>                   | r = -0.295<br>p = 0.203 | r = -0.168<br>p = 0.472          | r = -0.075<br>p = 0.748          | r = -0.317<br>p = 0.169         | r = 0.275<br>p = 0.249           | r = -0.054<br>p = 0.816          | r = 0.170<br>p = 0.480            |
| 53 | <b>Lachnospiraceae_[G-3]</b>                | r = 0.211<br>p = 0.367  | r = -0.403<br>p = 0.077          | r = -0.397<br>p = 0.081          | r = 0.145<br>p = 0.534          | r = -0.071<br>p = 0.770          | r = -0.085<br>p = 0.719          | r = -0.264<br>p = 0.268           |
| 54 | <b>Peptostreptococcaceae_[XI]<br/>[G-1]</b> | r = -0.234<br>p = 0.327 | r = 0.046<br>p = 0.848           | r = 0.339<br>p = 0.153           | r = -0.005<br>p = 0.980         | r = 0.393<br>p = 0.104           | r = 0.102<br>p = 0.673           | r = -0.018<br>p = 0.941           |
| 55 | <b>Parvimonas</b>                           | r = 0.009<br>p = 0.967  | r = -0.335<br>p = 0.145          | r = -0.305<br>p = 0.187          | r = 0.020<br>p = 0.932          | r = -0.146<br>p = 0.546          | r = -0.295<br>p = 0.203          | r = <b>-0.474 *</b><br>p = 0.040  |
| 56 | <b>Staphylococcus</b>                       | r = -0.078<br>p = 0.738 | r = 0.385<br>p = 0.092           | r = <b>0.474 *</b><br>p = 0.035  | r = 0.262<br>p = 0.260          | r = 0.439<br>p = 0.059           | r = 0.069<br>p = 0.767           | r = 0.429<br>p = 0.065            |
| 57 | <b>Atopobium</b>                            | r = 0.109<br>p = 0.652  | r = -0.054<br>p = 0.820          | r = -0.135<br>p = 0.575          | r = 0.118<br>p = 0.626          | r = 0.013<br>p = 0.954           | r = -0.085<br>p = 0.721          | r = 0.205<br>p = 0.407            |
| 58 | <b>Actinobaculum</b>                        | r = 0.397<br>p = 0.091  | r = -0.037<br>p = 0.877          | r = -0.224<br>p = 0.349          | r = 0.193<br>p = 0.422          | r = 0.066<br>p = 0.786           | r = -0.187<br>p = 0.435          | r = -0.213<br>p = 0.388           |
| 59 | <b>Campylobacter</b>                        | r = -0.015<br>p = 0.947 | r = -0.147<br>p = 0.529          | r = 0.110<br>p = 0.639           | r = 0.236<br>p = 0.311          | r = 0.165<br>p = 0.493           | r = 0.177<br>p = 0.448           | r = 0.218<br>p = 0.365            |
| 60 | <b>Cardiobacterium</b>                      | r = 0.409<br>p = 0.072  | r = -0.129<br>p = 0.581          | r = -0.107<br>p = 0.649          | r = <b>0.481 *</b><br>p = 0.031 | r = 0.007<br>p = 0.974           | r = 0.045<br>p = 0.846           | r = 0.005<br>p = 0.980            |

|           |                                     |                         |                        |                        |                         |                        |                         |                        |
|-----------|-------------------------------------|-------------------------|------------------------|------------------------|-------------------------|------------------------|-------------------------|------------------------|
| <b>61</b> | <b>Haemophilus</b>                  | r = -0.044<br>p = 0.851 | r = 0.107<br>p = 0.649 | r = 0.138<br>p = 0.555 | r = -0.14<br>p = 0.551  | r = 0.168<br>p = 0.484 | r = 0.426<br>p = 0.0603 | r = 0.249<br>p = 0.298 |
| <b>62</b> | <b>Aggregatibacter</b>              | r = 0.108<br>p = 0.644  | r = 0.188<br>p = 0.421 | r = 0.245<br>p = 0.292 | r = 0.174<br>p = 0.456  | r = 0.311<br>p = 0.191 | r = 0.459<br>p = 0.0414 | r = 0.121<br>p = 0.615 |
| <b>63</b> | <b>Pasteurellaceae_unclassified</b> | r = -0.197<br>p = 0.399 | r = 0.263<br>p = 0.257 | r = 0.289<br>p = 0.213 | r = 0.138<br>p = 0.555  | r = 0.398<br>p = 0.089 | r = 0.274<br>p = 0.238  | r = 0.153<br>p = 0.526 |
| <b>64</b> | <b>Lautropia</b>                    | r = -0.412<br>p = 0.070 | r = 0.138<br>p = 0.555 | r = 0.305<br>p = 0.187 | r = -0.180<br>p = 0.440 | r = 0.295<br>p = 0.216 | r = 0.264<br>p = 0.255  | r = 0.146<br>p = 0.546 |

*Footnote:* Association between the relative abundance of bacterial genus and diversity indexes with cytokine and signal proteins. IL-8: *Interleukin 8*. IL1- $\beta$ : *Interleukin 1-Beta*. IL-6: *Interleukin 6*. VEGF: *Vascular endothelial growth factor*. hs-CRP: *high-sensitivity C-reactive protein*. TNF- $\alpha$ : *Tumor necrosis factor-alpha*. *Pseudomonadota*, former *Proteobacteria*. *Bacillota*, former *Firmicutes*. *Bacteroidota*, former *Bacteroidetes*. *Actinomycetota*, former *Actinobacteria*. Number of samples = 20 for all correlations, except for correlations with TNF- $\alpha$  and VEGF with a number of samples = 19, due to the limited volume of samples for one volunteer at the Final moment. Statistical analysis: Spearman Rank Order Correlation. \*Significant association ( $P < 0.05$ ) between the data.
