# Supplementary material for: A 7-Week Summer Camp in Antarctica Induces Fluctuations on Human Oral Microbiome, Pro-Inflammatory Markers and Metabolic Hormones Profile
Source: MDPI journal article supplement (doi:10.3390/microorganisms11020339), 2023-01-30
Supplement: s1 [file s1]

## Individual relative abundance of microbiome phyla and species detected during a camp in Antarctica

Michele M Moraes, Thiago T Mendes, Leandro Borges, Alice L Marques, Cristian Núñez-Espinosa, Dawit AP Gonçalves, Carolina B Simões, Tales S Vieira, Roberto VP Ladeira, Talita GB Lourenco, Danielle V Ribeiro, Elaine Hatanaka, Debora Heller, Rosa ME Arantes

This is Supplemental material S4 for the article: **A 7-week summer camp in Antarctica induces fluctuations on human oral microbiome, pro-inflammatory markers and metabolic hormones profile**

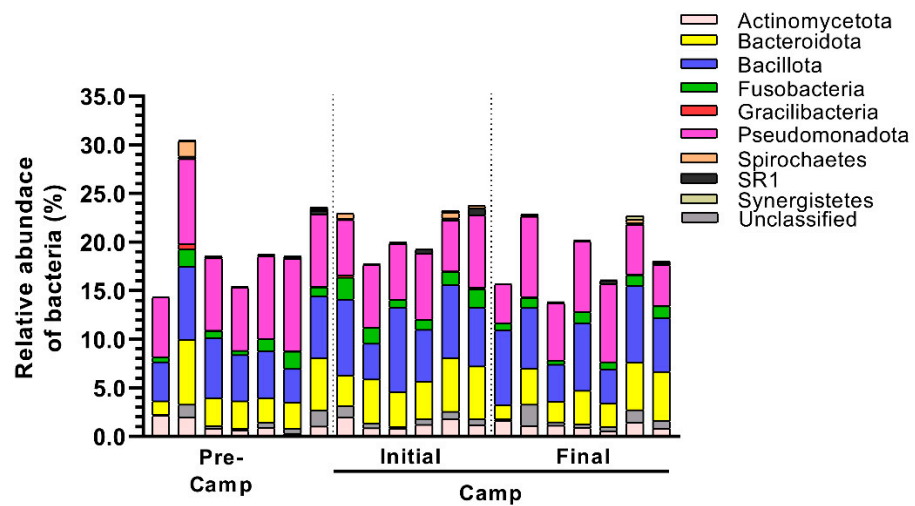

**Figure S4.** Microbiome phyla. *Pseudomonadota*, former *Proteobacteria*. *Bacillota*, former *Firmicutes*. *Bacteroidota*, former *Bacteroidetes*. *Actinomycetota*, former *Actinobacteria*. The data are expressed as individual values.

**Table S4. Microbiome species detected.**

| Taxon                              | Pre-Camp  | Camp     |          |
|------------------------------------|-----------|----------|----------|
|                                    |           | Initial  | Final    |
| Haemophilus_unclassified           | 0,0295036 | 0,017403 | 0,025236 |
| Streptococcus sp,_oral_taxon_058   | 0,0111506 | 0,013206 | 0,011071 |
| Streptococcus_unclassified         | 0,0080583 | 0,009853 | 0,009032 |
| Haemophilus paraphrohaemolyticus   | 0,0087987 | 0,009641 | 0,007774 |
| Neisseria subflava                 | 0,0089107 | 0,007273 | 0,003639 |
| Neisseria_unclassified             | 0,0063539 | 0,007397 | 0,004188 |
| Prevotella_unclassified            | 0,0040473 | 0,005838 | 0,005328 |
| Lautropia mirabilis                | 0,0048636 | 0,001411 | 0,003694 |
| Veillonella_unclassified           | 0,0027089 | 0,003271 | 0,003005 |
| Pasteurellaceae_unclassified       | 0,0043243 | 0,002233 | 0,002048 |
| Pasteurellaceae_unclassified       | 0,0043243 | 0,002233 | 0,002048 |
| Veillonella dispar                 | 0,0020311 | 0,002589 | 0,003229 |
| Gemella morbillorum                | 0,0018677 | 0,003336 | 0,002115 |
| Porphyromonas pasteri              | 0,0024811 | 0,002768 | 0,00164  |
| Veillonella parvula                | 0,0022533 | 0,002432 | 0,001971 |
| Aggregatibacter_unclassified       | 0,0020957 | 0,001635 | 0,002475 |
| Fusobacterium_unclassified         | 0,00153   | 0,003369 | 0,001551 |
| Granulicatella adiacens            | 0,0015601 | 0,002122 | 0,002246 |
| Fusobacterium periodonticum        | 0,0020027 | 0,002162 | 0,001023 |
| Neisseria flava                    | 0,001737  | 0,002168 | 0,00128  |
| Prevotella oris                    | 0,001809  | 0,001674 | 0,001422 |
| Prevotella nanceiensis             | 0,0012907 | 0,001406 | 0,002063 |
| Leptotrichia_unclassified          | 0,0017596 | 0,002177 | 0,000934 |
| Kingella_unclassified              | 0,0010174 | 0,001522 | 0,002111 |
| Granulicatella elegans             | 0,0014067 | 0,002531 | 0,000765 |
| Actinomyces_unclassified           | 0,0013174 | 0,002212 | 0,001112 |
| Oribacterium_unclassified          | 0,0011313 | 0,000622 | 0,002593 |
| Neisseriaceae_unclassified         | 0,0010251 | 0,001732 | 0,001661 |
| Neisseriaceae_unclassified         | 0,0010251 | 0,001732 | 0,001661 |
| Lachnospiraceae_[XIV]_unclassified | 0,001754  | 0,0013   | 0,00104  |
| Streptococcus vestibularis         | 0,0005561 | 0,001057 | 0,001898 |
| Bergeyella sp,_oral_taxon_900      | 0,0007763 | 0,002846 | 5,14E-05 |
| Alloprevotella_unclassified        | 0,0009359 | 0,00101  | 0,001388 |
| Rothia dentocariosa                | 0,001511  | 0,000587 | 0,001126 |

|                                  |           |          |          |
|----------------------------------|-----------|----------|----------|
| Prevotella sp_oral_taxon_472     | 0,0011464 | 0,001464 | 0,000697 |
| Rothia mucilaginosa              | 0,000879  | 0,001048 | 0,001315 |
| Actinomyces sp_oral_taxon_180    | 0,0011067 | 0,001761 | 0,00045  |
| Bergeyella sp_oral_taxon_322     | 0,0011979 | 0,000622 | 0,001188 |
| Corynebacterium durum            | 0,0014711 | 0,001083 | 0,000484 |
| Capnocytophaga_unclassified      | 0,0010576 | 0,001167 | 0,000826 |
| Porphyromonas_unclassified       | 0,0010479 | 0,001081 | 0,000898 |
| Capnocytophaga sputigena         | 0,0008656 | 0,0006   | 0,001422 |
| Alloprevotella sp_oral_taxon_473 | 0,0006491 | 0,001533 | 0,000786 |
| Rothia aeria                     | 0,001103  | 0,000835 | 0,000898 |
| Megasphaera micronuciformis      | 0,0010571 | 0,000629 | 0,001042 |
| Prevotella pallens               | 0,0003454 | 0,000676 | 0,001642 |
| Alloprevotella tanneriae         | 0,0005354 | 0,00163  | 0,000615 |
| Atopobium_unclassified           | 0,0005033 | 0,00076  | 0,001333 |
| Selenomonas_unclassified         | 0,0007573 | 0,000505 | 0,001255 |
| Leptotrichia sp_oral_taxon_392   | 0,000598  | 0,00097  | 0,000957 |
| Porphyromonas sp_oral_taxon_930  | 0,0008523 | 0,00118  | 0,000418 |
| Campylobacter_unclassified       | 0,0009814 | 0,000487 | 0,000862 |
| Streptococcus parasanguinis_II   | 0,0005316 | 0,000536 | 0,001263 |
| Capnocytophaga leadbetteri       | 0,000583  | 0,001464 | 0,000403 |
| aphrophilus                      | 0,0011903 | 0,000598 | 0,000522 |
| Prevotella salivae               | 0,000503  | 0,001358 | 0,000505 |
| Veillonella sp_oral_taxon_780    | 0,0008371 | 0,000682 | 0,000738 |
| Catonella morbi                  | 0,0008807 | 0,000758 | 0,000604 |
| Porphyromonas catoniae           | 0,0008581 | 0,000547 | 0,000731 |
| Treponema_unclassified           | 0,0010214 | 0,000817 | 0,000327 |
| SR1_[G-1] sp_oral_taxon_875      | 0,0005467 | 0,001163 | 0,000442 |
| Leptotrichia hongkongensis       | 0,0005163 | 0,000582 | 0,000955 |
| Peptostreptococcaceae_[XI][G-7]  | 0,0009093 | 0,000735 | 0,000406 |
| Lachnoanaerobaculum umeaense     | 0,000334  | 0,000684 | 0,001012 |
| Bacilli defectiva                | 0,0005847 | 0,000921 | 0,000554 |
| Alloprevotella sp_oral_taxon_308 | 0,0004346 | 0,000731 | 0,000835 |
| Actinomyces sp_oral_taxon_169    | 0,000596  | 0,000576 | 0,000801 |
| Prevotella melaninogenica        | 0,000446  | 0,000742 | 0,00075  |
| Corynebacterium matruchotii      | 0,0004554 | 0,000702 | 0,000752 |
| Campylobacter rectus             | 0,0006607 | 0,000826 | 0,000401 |
| Actinomyces graevenitzi          | 0,0003076 | 0,001322 | 0,000296 |

|                                          |           |          |          |
|------------------------------------------|-----------|----------|----------|
| Ruminococcaceae_[G-1]                    | 0,0005427 | 0,001145 | 0,000192 |
| Ruminococcaceae_[G-1] sp,_oral_taxon_075 | 0,0005427 | 0,001145 | 0,000192 |
| Prevotella veroralis                     | 0,0009873 | 0,000357 | 0,000385 |
| Prevotella denticola                     | 0,0005181 | 0,000538 | 0,000689 |
| Kingella oralis                          | 0,0004023 | 0,000848 | 0,000535 |
| Eikenella corrodens                      | 0,0007556 | 0,000647 | 0,000317 |
| Dialister invisus                        | 0,0006436 | 0,000715 | 0,000362 |
| Cardiobacterium hominis                  | 0,0006377 | 0,000485 | 0,000543 |
| Oribacterium asaccharolyticum            | 0,000368  | 0,000642 | 0,000647 |
| SR1_[G-1] sp,_oral_taxon_345             | 0,0003264 | 0,00103  | 0,000345 |
| Stomatobaculum sp,_oral_taxon_097        | 0,0004404 | 0,000629 | 0,000552 |
| Prevotella oulorum                       | 0,00101   | 0,00023  | 0,00029  |
| Peptostreptococcaceae_[XI][G-5]          | 0,0002371 | 0,00099  | 0,000408 |
| Solobacterium moorei                     | 0,0004063 | 0,000693 | 0,000429 |
| Prevotella sp,_oral_taxon_317            | 0,0006091 | 0,000427 | 0,000425 |
| Bergeyella_unclassified                  | 0,0002164 | 0,001212 | 0,000137 |
| Capnocytophaga gingivalis                | 0,0006511 | 0,00033  | 0,000431 |
| Selenomonas artemidis                    | 0,0007026 | 0,000403 | 0,000315 |
| Fusobacterium nucleatum_subsp._vincentii | 0,0005087 | 0,000731 | 0,000228 |
| Bergeyella sp,_oral_taxon_931            | 0,0003399 | 0,000755 | 0,000351 |
| Leptotrichia sp,_oral_taxon_417          | 0,0008789 | 0,000326 | 0,000177 |
| SR1_[G-1] sp,_oral_taxon_874             | 0,000577  | 0,000279 | 0,000509 |
| Pseudomonas fluorescens                  | 0,000074  | 0,001227 | 0,000176 |
| Lachnospiraceae_[G-2] sp,_oral_taxon_100 | 0,000486  | 0,000552 | 0,000311 |
| Peptostreptococcus stomatis              | 0,0005373 | 0,000301 | 0,000473 |
| Actinomyces lingnae_[NVP]                | 0,000393  | 0,000474 | 0,000459 |
| Selenomonas sp,_oral_taxon_136           | 0,0003437 | 0,000441 | 0,000518 |
| Leptotrichia hofstadii                   | 0,0003131 | 0,000383 | 0,000598 |
| Leptotrichia sp,_oral_taxon_221          | 0,0003473 | 0,000321 | 0,000613 |
| Ruminococcaceae_[G-2] sp,_oral_taxon_085 | 0,0003263 | 0,000518 | 0,000463 |
| Prevotella intermedia                    | 0,0004727 | 0,000616 | 0,000228 |
| Alloprevotella rava                      | 0,0006131 | 0,000423 | 0,000224 |
| Parvimonas micra                         | 0,0004519 | 0,0005   | 0,000283 |
| Fusobacterium sp,_oral_taxon_203         | 0,0003133 | 0,000534 | 0,000372 |
| Tannerella sp,_oral_taxon_286            | 0,0005714 | 0,000252 | 0,000345 |
| Porphyromonas endodontalis               | 0,0004956 | 0,000368 | 0,000302 |
| Kingella sp,_oral_taxon_012              | 0,0004536 | 0,000312 | 0,000364 |

|                                                    |           |          |          |
|----------------------------------------------------|-----------|----------|----------|
| Treponema sp,_oral_taxon_237                       | 0,0005769 | 0,000412 | 0,000146 |
| Leptotrichia sp,_oral_taxon_212                    | 0,0004859 | 0,000383 | 0,000232 |
| Campylobacter sp,_oral_taxon_044                   | 0,0002183 | 0,000611 | 0,000279 |
| Bacteroides heparinolyticus                        | 0,0003417 | 0,000367 | 0,000363 |
| Prevotella nigrescens                              | 0,0005049 | 8,87E-05 | 0,000421 |
| Alloprevotella sp,_oral_taxon_912                  | 0,0002849 | 0,00029  | 0,000461 |
| Leptotrichia sp,_oral_taxon_498                    | 5,114E-05 | 0,000755 | 0,000279 |
| Capnocytophaga sp,_oral_taxon_338                  | 0,0001291 | 0,000403 | 0,000484 |
| Bacteroides sp,_oral_taxon_274                     | 0,000355  | 0,000414 | 0,000243 |
| Eubacterium sp,_oral_taxon_493                     | 0,0001766 | 0,000514 | 0,000327 |
| Kingella sp,_oral_taxon_459                        | 0,0001916 | 0,000567 | 0,000266 |
| Lachnoanaerobaculum orale                          | 0,0002069 | 0,000281 | 0,000465 |
| Actinobacteria_unclassified                        | 0,0002846 | 0,000377 | 0,000294 |
| Oribacterium parvum                                | 0,0003244 | 0,000297 | 0,000311 |
| Peptostreptococcaceae_[XI][G-7] sp,_oral_taxon_081 | 0,0004024 | 0,000288 | 0,000239 |
| Neisseria oralis                                   | 0,0001444 | 0,000788 | 4,19E-05 |
| Selenomonas sputigena                              | 0,0002277 | 0,000326 | 0,00033  |
| Gemella warneri                                    | 0,0003984 | 0,000193 | 0,00027  |
| Cardiobacterium valvarum                           | 0,0002733 | 0,000432 | 0,000163 |
| Leptotrichia sp,_oral_taxon_215                    | 0,0002031 | 0,000401 | 0,000243 |
| Bacteroidetes_unclassified                         | 0,0002541 | 0,000281 | 0,00029  |
| Bergeyella sp,_oral_taxon_907                      | 7,971E-05 | 0,000567 | 0,000205 |
| Veillonellaceae_[G-1]                              | 0,0002164 | 0,000321 | 0,000258 |
| [Eubacterium]_yurii_subsp._yurii_&_margaretiae     | 0,0004367 | 0,000244 | 8,93E-05 |
| GN02_[G-1] sp,_oral_taxon_872                      | 0,0004954 | 0,000102 | 0,000142 |
| sp,_oral_taxon_458                                 | 0,000334  | 0,000224 | 0,000197 |
| Klebsiella pneumoniae                              | 0,000539  | 4,63E-05 | 0,00014  |
| Neisseria bacilliformis                            | 0,000243  | 4,43E-05 | 0,000429 |
| Haemophilus parainfluenzae                         | 0,000319  | 0,0002   | 0,00019  |
| Leptotrichia wadei                                 | 0,000148  | 0,000403 | 0,000184 |
| Bergeyella sp,_oral_taxon_319                      | 3,714E-06 | 0,00076  | 1,13E-05 |
| Capnocytophaga granulosa                           | 0,0002106 | 0,000137 | 0,000336 |
| Sneathia_unclassified                              | 0,0001539 | 0,000295 | 0,000254 |
| GN02_[G-1] sp,_oral_taxon_871                      | 0,0003341 | 0,000361 | 1,31E-05 |
| Oribacterium sinus                                 | 0,0001576 | 0,00012  | 0,000395 |
| Mogibacterium vescum                               | 0,0001157 | 0,000352 | 0,000234 |
| Parvimonas alocis                                  | 0,0001557 | 0,00033  | 0,000211 |

|                                          |           |          |          |
|------------------------------------------|-----------|----------|----------|
| Bacteroides_unclassified                 | 0,0002166 | 0,00025  | 0,000214 |
| Stomatobaculum longum                    | 0,0002354 | 0,000166 | 0,000266 |
| Corynebacterium_unclassified             | 0,0002336 | 0,000337 | 0,000108 |
| Escherichia coli                         | 0,0001633 | 0,000157 | 0,000323 |
| Bacteroidetes_[G-5] sp,_oral_taxon_511   | 0,0001556 | 0,000295 | 0,000211 |
| Fretibacterium sp,_oral_taxon_361        | 0,0001613 | 0,000208 | 0,00027  |
| Capnocytophaga sp,_oral_taxon_336        | 0,000226  | 0,000264 | 0,000148 |
| Veillonellaceae_[G-1] sp,_oral_taxon_155 | 0,0001783 | 0,000259 | 0,000184 |
| Treponema sp,_oral_taxon_951             | 0,000393  | 0,000173 | 3,41E-05 |
| [Eubacterium]_saphenum                   | 6,071E-05 | 0,000476 | 8,17E-05 |
| Fretibacterium fastidiosum               | 0,0001081 | 0,000166 | 0,000287 |
| Leptotrichia goodfellowii                | 0,0001747 | 0,000279 | 0,000112 |
| Lachnospiraceae_[G-2]_unclassified       | 0,0001744 | 0,000292 | 9,11E-05 |
| Dialister pneumosintes                   | 0,0001803 | 0,000293 | 8,54E-05 |
| Prevotella maculosa                      | 0,0002544 | 0,000139 | 0,000135 |
| Prevotella saccharolytica                | 0,0001594 | 0,000255 | 0,000123 |
| Peptococcus sp,_oral_taxon_167           | 0,0002181 | 0,000142 | 0,000161 |
| Prevotella sp,_oral_taxon_475            | 0,0001443 | 0,00014  | 0,000228 |
| [Eubacterium] sp,_oral_taxon_091         | 0,0002847 | 0,000162 | 6,27E-05 |
| Actinomycetales_unclassified             | 0,0001177 | 0,000303 | 9,49E-05 |
| Prevotella sp,_oral_taxon_300            | 8,914E-05 | 0,000228 | 0,000186 |
| Lachnospiraceae_[G-2] sp,_oral_taxon_500 | 0,0002297 | 7,75E-05 | 0,000175 |
| Prevotella aurantiaca                    | 0,0003454 | 7,53E-05 | 4,17E-05 |
| Simonsiella muelleri                     | 0,0001441 | 0,000233 | 0,000108 |
| Parvimonas_unclassified                  | 0,0001633 | 0,000255 | 6,64E-05 |
| Selenomonas sp,_oral_taxon_126           | 0,0001936 | 9,53E-05 | 0,000154 |
| Campylobacter concisus                   | 0,0001044 | 0,000093 | 0,000245 |
| Actinobacteria sp,_oral_taxon_183        | 0,0001443 | 0,000122 | 0,000171 |
| Leptotrichia sp,_oral_taxon_218          | 0,000093  | 0,000179 | 0,000173 |
| Tannerella forsythia                     | 0,000262  | 9,97E-05 | 6,26E-05 |
| Catonella sp,_oral_taxon_166             | 0,0001463 | 0,00021  | 7,97E-05 |
| Streptococcus anginosus                  | 1,514E-05 | 0,000177 | 0,000232 |
| SR1_[G-1]_unclassified                   | 0,000076  | 0,000255 | 0,000104 |
| Streptococcus mutans                     | 3,714E-06 | 2,65E-05 | 0,000368 |
| Leptotrichia sp,_oral_taxon_223          | 0,0001613 | 0,000175 | 8,16E-05 |
| Atopobium parvulum                       | 0,000152  | 7,28E-05 | 0,000175 |
| Oribacterium sp,_oral_taxon_078          | 5,714E-05 | 0,000073 | 0,000268 |

|                                              |           |          |          |
|----------------------------------------------|-----------|----------|----------|
| Granulicatella_unclassified                  | 8,743E-05 | 0,00029  | 4,54E-05 |
| Capnocytophaga sp,_oral_taxon_326            | 0,0001689 | 0,000162 | 7,21E-05 |
| Treponema socranskii                         | 0,0001709 | 0,00016  | 5,89E-05 |
| Capnocytophaga haemolytica                   | 0,0002183 | 5,75E-05 | 9,13E-05 |
| Treponema sp,_oral_taxon_246                 | 0,0002563 | 0,000111 | 7,57E-06 |
| Prevotella sp,_oral_taxon_443                | 0,000131  | 0,000146 | 0,000091 |
| Catonella ignava                             | 0,0001689 | 0,000157 | 4,39E-05 |
| Leptotrichia shahii                          | 6,071E-05 | 0,000162 | 0,000146 |
| Veillonella rogosae                          | 0,0001099 | 0,000135 | 0,000108 |
| Prevotella pleuritidis                       | 0,0001349 | 0,000126 | 7,79E-05 |
| Mycoplasma faucium                           | 6,271E-05 | 0,00023  | 5,11E-05 |
| Prevotella fusca                             | 0,000112  | 0,000042 | 0,000161 |
| Tannerella_unclassified                      | 0,0002106 | 3,32E-05 | 6,84E-05 |
| Peptostreptococcaceae_[XI][G-9]              | 0,0001159 | 0,000133 | 7,59E-05 |
| [Eubacterium]_brachy                         | 0,0001159 | 0,000133 | 7,59E-05 |
| Peptostreptococcaceae_[XI][G-7]_unclassified | 6,457E-05 | 0,000193 | 6,64E-05 |
| Fretibacterium_unclassified                  | 0,000074  | 0,000111 | 0,000127 |
| Leptotrichia sp,_oral_taxon_225              | 0,0001251 | 0,000122 | 5,89E-05 |
| Bacilli_unclassified                         | 7,029E-05 | 0,000184 | 5,31E-05 |
| Lachnoanaerobaculum_unclassified             | 8,143E-05 | 0,000122 | 7,96E-05 |
| Peptostreptococcaceae_[XI][G-6]              | 3,786E-05 | 0,000235 | 2,66E-05 |
| Porphyromonas uenonis                        | 4,371E-05 | 0,000184 | 6,07E-05 |
| Lachnospiraceae_[G-2] sp,_oral_taxon_088     | 0,0001329 | 0,000144 | 1,86E-06 |
| Comamonadaceae_unclassified                  | 3,243E-05 | 0,000182 | 6,27E-05 |
| Comamonadaceae_unclassified                  | 3,243E-05 | 0,000182 | 6,27E-05 |
| Proteobacteria_unclassified                  | 8,357E-05 | 0,000126 | 5,69E-05 |
| Proteobacteria_unclassified                  | 8,357E-05 | 0,000126 | 5,69E-05 |
| Rothia_unclassified                          | 0,0001004 | 6,22E-05 | 8,91E-05 |
| Lachnoanaerobaculum saburreum                | 6,257E-05 | 0,000164 | 3,99E-05 |
| Anaeroglobus geminatus                       | 5,514E-05 | 0,000151 | 5,69E-05 |
| Bacteroidetes_[G-5] sp,_oral_taxon_505       | 0,0001386 | 9,97E-05 | 1,51E-05 |
| Lachnospiraceae_[G-2] sp,_oral_taxon_096     | 9,314E-05 | 0,000124 | 3,99E-05 |
| Streptococcus sp,_oral_taxon_093             | 3,229E-05 | 0,000157 | 6,84E-05 |
| [Eubacterium]_nodatum                        | 0,000036  | 0,000204 | 2,47E-05 |
| Stenotrophomonas                             | 0         | 4,22E-05 | 0,000196 |
| Stenotrophomonas maltophilia                 | 0         | 4,22E-05 | 0,000196 |
| Gemella_unclassified                         | 0,000074  | 0,000122 | 4,74E-05 |

|                                          |           |          |          |
|------------------------------------------|-----------|----------|----------|
| Lactobacillus_unclassified               | 2,457E-05 | 0,000208 | 2,27E-05 |
| Mitsuokella sp,_oral_taxon_521           | 4,371E-05 | 0,000051 | 0,000139 |
| Catonella sp,_oral_taxon_451             | 4,929E-05 | 9,75E-05 | 0,000091 |
| Leptotrichia sp,_oral_taxon_219          | 7,214E-05 | 0,000124 | 4,56E-05 |
| Bifidobacterium wiggisiae                | 0,0001234 | 1,33E-05 | 8,34E-05 |
| Acinetobacter sp,_oral_taxon_408         | 1,329E-05 | 0,000228 | 0        |
| Treponema sp,_oral_taxon_250             | 0,0001614 | 4,87E-05 | 5,71E-06 |
| Campylobacter gracilis                   | 0,0001424 | 0,000031 | 0,000038 |
| Prevotella dentalis                      | 0,000072  | 0,000109 | 0,000038 |
| Acinetobacter_unclassified               | 0,0001956 | 0,000009 | 0        |
| GN02 sp,_oral_taxon_873                  | 0,000038  | 0,000164 | 0,000021 |
| Treponema denticola                      | 3,971E-05 | 0,000155 | 2,47E-05 |
| Butyrivibrio sp,_oral_taxon_080          | 1,714E-05 | 1,55E-05 | 0,000165 |
| Mycoplasma salivarium                    | 0,0001157 | 3,77E-05 | 4,37E-05 |
| Pedobacter_unclassified                  | 0         | 0,000219 | 0        |
| Treponema lecithinolyticum               | 0,00011   | 5,53E-05 | 3,03E-05 |
| Prevotella micans                        | 0,000095  | 8,63E-05 | 1,51E-05 |
| Acinetobacter baumannii                  | 0,0001729 | 8,83E-06 | 1,86E-06 |
| Prevotella sp,_oral_taxon_396            | 4,371E-05 | 8,88E-05 | 6,09E-05 |
| Ottowia sp,_oral_taxon_894               | 5,129E-05 | 0,000106 | 3,79E-05 |
| Capnocytophaga sp,_oral_taxon_412        | 5,514E-05 | 3,55E-05 | 8,73E-05 |
| Prevotella sp,_oral_taxon_315            | 5,514E-05 | 8,18E-05 | 3,97E-05 |
| Achromobacter xylosoxidans               | 0         | 0        | 0,00015  |
| Prevotella baroniae                      | 0,000074  | 5,77E-05 | 2,46E-05 |
| Actinomyces gerencseriae                 | 2,271E-05 | 1,98E-05 | 0,000104 |
| Atopobium sp,_oral_taxon_199             | 1,329E-05 | 3,12E-05 | 0,000104 |
| Actinomyces sp,_oral_taxon_448           | 5,886E-05 | 4,87E-05 | 0,000036 |
| Tannerella sp,_oral_taxon_916            | 0,0001177 | 1,55E-05 | 5,71E-06 |
| Lactobacillusfermentum                   | 0         | 0,000042 | 0,000101 |
| Treponema sp,_oral_taxon_263             | 0,000036  | 0,000062 | 4,56E-05 |
| Streptococcus sp,_oral_taxon_402         | 2,471E-05 | 0,00006  | 5,69E-05 |
| Veillonellaceae [G-1] sp,_oral_taxon_150 | 2,857E-05 | 0,000053 | 5,13E-05 |
| Cardiobacterium_unclassified             | 3,614E-05 | 0,000082 | 0,000019 |
| Bacteroidetes [G-3] sp,_oral_taxon_503   | 1,514E-05 | 0,000062 | 5,11E-05 |
| Desulfovibrio fairfieldensis             | 0,000019  | 4,5E-06  | 9,69E-05 |
| Actinobacteria sp,_oral_taxon_848        | 3,414E-05 | 4,87E-05 | 3,99E-05 |
| Bacteroidetes [G-5] sp,_oral_taxon_507   | 2,271E-05 | 0,000106 | 0        |

|                                              |           |          |          |
|----------------------------------------------|-----------|----------|----------|
| Lactobacillus gasseri                        | 1,143E-05 | 1,55E-05 | 8,73E-05 |
| Lachnoanaerobaculum sp,_oral_taxon_496       | 0         | 2,88E-05 | 8,73E-05 |
| Oribacterium satelles                        | 3,786E-05 | 2,87E-05 | 4,74E-05 |
| Selenomonas diana                            | 5,714E-06 | 1,98E-05 | 8,56E-05 |
| Prevotella sp,_oral_taxon_305                | 3,614E-05 | 4,43E-05 | 3,23E-05 |
| Prevotella sp,_oral_taxon_942                | 6,257E-05 | 4,5E-06  | 3,99E-05 |
| Delftia acidovorans                          | 1,857E-06 | 1,77E-05 | 8,73E-05 |
| Sphingomonas echinoides                      | 3,857E-06 | 0,000113 | 0        |
| Rothia omnicoles                             | 4,557E-05 | 2,17E-06 | 5,13E-05 |
| Dialister_unclassified                       | 4,357E-05 | 2,65E-05 | 3,01E-05 |
| Betaproteobacteria_unclassified              | 4,557E-05 | 2,43E-05 | 2,84E-05 |
| Betaproteobacteria_unclassified              | 4,557E-05 | 2,43E-05 | 2,84E-05 |
| Selenomonas flueggei                         | 1,329E-05 | 1,12E-05 | 7,01E-05 |
| Mogibacterium timidum                        | 3,857E-06 | 9,73E-05 | 3,71E-06 |
| Erysipelotrichaceae_[G-1] sp,_oral_taxon_905 | 9,571E-06 | 0,000011 | 7,21E-05 |
| Moraxella catarrhalis                        | 7,214E-05 | 1,77E-05 | 1,86E-06 |
| Bifidobacterium denticolens                  | 9,429E-06 | 8,87E-05 | 0        |
| Treponema pectinovorum                       | 0         | 8,83E-06 | 7,79E-05 |
| Bacteroidetes_[G-3] sp,_oral_taxon_280       | 2,086E-05 | 6,87E-05 | 3,71E-06 |
| Moraxella osloensis                          | 6,071E-05 | 1,98E-05 | 1,86E-06 |
| Treponema sp,_oral_taxon_227                 | 7,571E-06 | 6,65E-05 | 1,14E-05 |
| Treponema maltophilum                        | 2,657E-05 | 0,000031 | 2,09E-05 |
| Prevotella sp,_oral_taxon_526                | 2,271E-05 | 2,65E-05 | 2,66E-05 |
| Treponema sp,_oral_taxon_257                 | 1,514E-05 | 6,67E-06 | 5,13E-05 |
| Haemophilus sp,_oral_taxon_036               | 2,086E-05 | 0,000031 | 2,29E-05 |
| Moraxella_unclassified                       | 1,329E-05 | 5,53E-05 | 5,71E-06 |
| Treponema sp,_oral_taxon_927                 | 5,714E-06 | 2,43E-05 | 3,99E-05 |
| Bifidobacterium dentium                      | 5,714E-06 | 6,67E-06 | 5,13E-05 |
| Prevotella buccae                            | 3,229E-05 | 2,22E-05 | 1,14E-05 |
| Prevotella marshii                           | 3,043E-05 | 2,22E-05 | 1,33E-05 |
| Veillonellaceae_unclassified                 | 9,429E-06 | 3,32E-05 | 2,26E-05 |
| Veillonellaceae_unclassified                 | 9,429E-06 | 3,32E-05 | 2,26E-05 |
| Treponema sp,_oral_taxon_234                 | 3,043E-05 | 2,65E-05 | 5,71E-06 |
| Dialister microaerophilus                    | 7,571E-06 | 0        | 4,93E-05 |
| Prevotella shahii                            | 1,143E-05 | 2,22E-05 | 2,49E-05 |
| Bifidobacterium_unclassified                 | 2,471E-05 | 8,83E-06 | 2,09E-05 |
| Mycoplasma orale                             | 1,529E-05 | 1,33E-05 | 2,66E-05 |

|                                              |           |          |          |
|----------------------------------------------|-----------|----------|----------|
| Burkholderiaceae_unclassified                | 1,343E-05 | 2,67E-05 | 0,000017 |
| Burkholderiaceae_unclassified                | 1,343E-05 | 2,67E-05 | 0,000017 |
| Gammaproteobacteria_unclassified             | 4,171E-05 | 1,33E-05 | 0        |
| Gammaproteobacteria_unclassified             | 4,171E-05 | 1,33E-05 | 0        |
| Prevotella enoeca                            | 3,043E-05 | 1,33E-05 | 9,57E-06 |
| GN02_[G-1]_unclassified                      | 0,000036  | 1,77E-05 | 0        |
| Treponema sp._oral_taxon_256                 | 1,143E-05 | 0,000011 | 3,04E-05 |
| Treponema sp._oral_taxon_226                 | 3,229E-05 | 1,55E-05 | 1,86E-06 |
| Treponema parvum                             | 2,271E-05 | 8,83E-06 | 1,51E-05 |
| Treponema sp._oral_taxon_490                 | 1,329E-05 | 2,88E-05 | 7,57E-06 |
| Prevotella sp._oral_taxon_313                | 3,029E-05 | 8,83E-06 | 5,71E-06 |
| Granulicatella faecalis                      | 0         | 0,000051 | 0        |
| Olsenella sp._oral_taxon_807                 | 3,714E-06 | 2,65E-05 | 1,51E-05 |
| Bacteroidetes_[G-3]_unclassified             | 2,843E-05 | 1,55E-05 | 0        |
| Prevotella oralis                            | 9,429E-06 | 0,00002  | 1,51E-05 |
| Erysipelotrichaceae_[G-1] sp._oral_taxon_904 | 9,429E-06 | 1,55E-05 | 0,000019 |
| [Eubacterium]_infirmum                       | 2,471E-05 | 8,83E-06 | 7,57E-06 |
| Butyrivibrio_unclassified                    | 1,329E-05 | 1,77E-05 | 9,43E-06 |
| Mycoplasma_unclassified                      | 5,714E-06 | 2,43E-05 | 1,14E-05 |
| Bacteroidetes sp._oral_taxon_272             | 7,571E-06 | 2,88E-05 | 3,86E-06 |
| Treponema sp._oral_taxon_508                 | 5,714E-06 | 2,43E-05 | 9,43E-06 |
| Actinomyces dentalis                         | 1,329E-05 | 1,32E-05 | 9,43E-06 |
| Peptostreptococcaceae_[XI][G-4]              | 1,143E-05 | 2,42E-05 | 1,86E-06 |
| Peptostreptococcaceae_[XI][G-4]_unclassified | 1,143E-05 | 2,42E-05 | 1,86E-06 |
| Leptotrichiaceae_unclassified                | 1,329E-05 | 8,83E-06 | 1,33E-05 |
| Leptotrichiaceae_unclassified                | 1,329E-05 | 8,83E-06 | 1,33E-05 |
| Pseudomonas_unclassified                     | 3,229E-05 | 0        | 1,86E-06 |
| Atopobium exigua                             | 5,714E-06 | 0        | 2,47E-05 |
| Peptostreptococcaceae_[XI][G-6]_unclassified | 1,857E-06 | 0,000031 | 1,86E-06 |
| Haemophilus influenzae                       | 9,429E-06 | 8,83E-06 | 1,31E-05 |
| Pseudomonas aeruginosa                       | 0         | 0,00002  | 1,33E-05 |
| Actinomyces sp._oral_taxon_896               | 9,571E-06 | 2,17E-06 | 1,71E-05 |
| Bacteroides pyogenes                         | 1,143E-05 | 1,33E-05 | 5,71E-06 |
| Streptococcus agalactiae                     | 2,471E-05 | 0        | 3,86E-06 |
| Lachnospiraceae_[G-2] sp._oral_taxon_086     | 5,571E-06 | 1,77E-05 | 7,57E-06 |
| Megasphaera sp._oral_taxon_123               | 3,857E-06 | 8,83E-06 | 1,71E-05 |
