# Supplementary material for: A 7-Week Summer Camp in Antarctica Induces Fluctuations on Human Oral Microbiome, Pro-Inflammatory Markers and Metabolic Hormones Profile
Source: Microorganisms. 2023 Jan 30;11(2):339. doi: 10.3390/microorganisms11020339 (PMC9960157; doi:10.3390/microorganisms11020339)
Supplement: Supplementary file 1 [file microorganisms-11-00339-s001.zip]

Archive with 5 entries (5 files):
- _.Suppl Material 1.pdf
- _.Suppl Material 2.pdf
- _.Suppl Material 3.pdf
- _.Suppl Material 4.pdf
- _.Suppl Material 5. Corrected Proof.pdf
